# Supplementary material for: Small molecule modulators of immune pattern recognition receptors
Source: Royal Society of Chemistry journal article supplement (doi:10.1039/d3cb00096f), 2023-01-01
Supplement: d3cb00096f1.xlsx [file d3cb00096f1.xlsx]

## Sheet: Sheet1
Target	Compound Name	Compound SMILES	Starndard Type	Standard Relation	Standard Value	Standard Unit	Reference
TLR2	Pam2CysK4	CCCCCCCCCCCCCCCC(=O)OC(COC(=O)CCCCCCCCCCCCCCC)CSC[C@@H](C(=O)N[C@H](C(=O)N[C@H](C(=O)N[C@H](C(=O)N[C@H](C(=O)N[C@H](C(=O)O)CCCCN)CCCCN)CCCCN)CCCCN)CO)N	EC50	=	0.067	nM	Lu et al., Org Biomol Chem 2020, 18, 5073-5094
TLR2	CU-T12-9	O=[N+](C1=CC=C(NC)C(N2C=NC(C3=CC=C(C(F)(F)F)C=C3)=C2)=C1)[O-]	EC50	=	52.9	nM	Cheng et al., Sci Adv 2015, 1, e1400139
TLR2	SMU-Z1	OC1=CC(C(F)(F)F)=CC=C1C2=CN(C3=CC([N+]([O-])=O)=CC=C3NC)C=N2	EC50	=	4.88	nM	Cen et al., Adv Sci 2019, 6, 1802042
TLR2	Dihydropyridine-quinolone 63	C[C@H](N1C(C(C(NCC2=CN=CC=C2)=O)=C3O)=O)CCC4=C1C3=CC(F)=C4	EC50	>	100	nM	Hu et al., J Med Chem 2019, 10, 132-136
TLR2	Diprovocim-1	O=C(N1C[C@@H](C(N[C@H]2C[C@@H]2C3=CC=CC=C3)=O)[C@H](C(N[C@@H]4[C@@H](C5=CC=CC=C5)C4)=O)C1)C6=CC=C(C(N7C[C@@H](C(N[C@H]8C[C@@H]8C9=CC=CC=C9)=O)[C@H](C(N[C@@H]%10[C@@H](C%11=CC=CC=C%11)C%10)=O)C7)=O)C=C6	EC50	=	0.11	nM	Morin et al., J Am Chem Soc 2018, 140, 14440-14454
TLR2	SMU-C80	S=C(NC1=C(C=CC=C2)C2=C(F)C=C1)NC3=C(C(OC(C)C)=O)C(CCC4)=C4S3	EC50	=	31.02	nM	Chen et al., J Med Chem 2021, 64, 7371-7389
TLR2	C29	OC1=C(/C=N/C2=C(C)C(C(O)=O)=CC=C2)C=CC=C1OC	IC50	=	19.7	μM	Mistry et al., Proc Nat Acad Sci 2015, 112, 5455-5460
TLR2	CU-CPT22	O=C(C(O)=CC(C(OCCCCCC)=O)=C1)C2=C1C=C(OC)C(O)=C2O	IC50	=	0.58	μM	Cheng et al., Angew Chem Int Ed 2012, 51, 12246-12249
TLR2	SMU-Y6	O=C1OC2=C(OC)C=C(CC(CN(C)C)O)C3=C2C4=C1C=CC(OC)=C4OC3=O	IC50	=	0.11	μM	Yang et al., Acta Pharm Sin B 2023
TLR4	Lipid A	O[C@H]1[C@H](OC(C[C@H](O)CCCCCCCCCCC)=O)[C@@H](NC(C[C@H](O)CCCCCCCCCCC)=O)[C@@H](OP([O-])([O-])=O)O[C@@H]1CO[C@H]2[C@H](NC(C[C@H](OC(CCCCCCCCCCC)=O)CCCCCCCCCCC)=O)[C@@H](OC(C[C@H](OC(CCCCCCCCCCCCC)=O)CCCCCCCCCCC)=O)[C@H](OP([O-])([O-])=O)[C@@H](CO)O2	EC50	=	21	nM	Gao & Guo, Med Res Rev 2018, 38, 556-601
TLR4	MPLA	O[C@H]1[C@H](O)[C@@H](NC(C[C@H](O)CCCCCCCCCCC)=O)C(O)O[C@@H]1CO[C@H]2[C@H](NC(C[C@H](OC(CCCCCCCCCCC)=O)CCCCCCCCCCC)=O)[C@@H](OC(C[C@H](OC(CCCCCCCCCCCCC)=O)CCCCCCCCCCC)=O)[C@H](OP([O-])([O-])=O)[C@@H](CO)O2	agonist				Casella and Mitchell, Cell Mol Life Sci, 2008, 65, 3231-3240
TLR4	Eritoran	O[C@H]1[C@H](OCCCCCCCCCC)[C@@H](NC(CC(CCCCCCCCCCC)=O)=O)[C@@H](OP([O-])([O-])=O)O[C@@H]1CO[C@H]2[C@H](NC(CCCCCCCCC/C=C\CCCCCC)=O)[C@@H](OC(C[C@H](OC)CCCCCCC)=O)[C@H](OP([O-])([O-])=O)[C@@H](COC)O2	IC50	=	1.2	nM	Zhang et al., Eur J Med Chem 2022, 235, 114291
TLR4	Pyrimido[5,4-b]indole 42	CN1C2=C(C=C(C3=CC=CC=C3)C=C2)C4=C1C(N(C5=CC=CC=C5)C(SCC(NC6CCCCC6)=O)=N4)=O	EC50	>	1	μM	Chan et al., J Med Chem 2013, 56, 4206-4223
TLR4	4-Aminoquinazoline 1a	O=C(C1=NC2=CC=CC=C2C(NC3=CC(OC4=CC=CC=C4)=CC([N+]([O-])=O)=C3)=N1)OCC	EC50	>	1	μM	Nour et al., Bioorg Med Chem Lett 2014, 24, 4931-4938
TLR4	Euodenine A	O=C1NC2=CC=CC=C2C3=C1[C@H]([C@H](C4=CC(OC)=C(OC)C(OC)=C4)[C@H]5C)[C@H]5C(C)(C)O3	EC50	=	0.39	μM	Neve et al., J Med Chem 2014, 57, 1252-1275
TLR4	Neoseptin-5	NC1=C(CCC2=CC=C(O)C=C2)C=C(C(N[C@H](C(OC(C)(C)C)=O)CCC3=CC=CC=C3)=O)C=C1	agonist				Morin et al., J Med Chem 2016, 59, 4812-4830
TLR4	22m	O=C(C1=C(Cl)C=CC=C1Cl)NC2=CC=C3C(C(C4=CC=C(NC=C5)C5=C4)=NN3)=C2	Kd	=	146	μM	Liu et al., J Med Chem 2019, 62, 5453-5469
TLR4	TAK-242	O=S(C1CCCC=C1C(OCC)=O)(NC2=CC=C(F)C=C2Cl)=O	IC50	>	0.1	μM	Matsunaga et al., Mol Pharm 2011, 79, 34-41
TLR5	TH-1020	C12=C(C(SC3=NN=C(C4=CC=NC=C4)N3CC5=CC=CC=C5)=NC=N2)SC6=C1C=CC=N6	IC50	=	11.7	μM	Yan et al., Chem Med Chem 2016, 11, 822-826
TLR3	4a	ClC1=C(C(N[C@@H](C(O)=O)CC2=CC=CC=C2)=O)SC3=CC(F)=CC=C31	IC50	=	3.44	μM	Cheng et al., J Am Chem Soc 2011, 133, 3764-3667
TLR3	SMU-CX24	CC(C)NCC(C=C1)=CC2=C1NC3=C2C=C4C(C=CN=C4)=C3	IC50	=	18.87	nM	Cen et al., Acta Pharm Sin B 2022, 12, 3667-3681
TLR3	CU-CPT17e	O=[N+](C(C=C1)=CC=C1COC2=C(OCC3=CC=C([N+]([O-])=O)C=C3)C=C(C=CC4(CCOCC4)O5)C5=C2)[O-]	EC50	=	4.8	μM	Zhang et al., J Med Chem 2017, 60, 5029-5044
TLR7	Imiquimod	NC1=NC(C=CC=C2)=C2C3=C1N=CN3CC(C)C	EC50	=	12.1	μM	Kaushik et al., RSC Med Chem 2021, 12, 1065-1120
TLR7	R-848	NC1=NC(C=CC=C2)=C2C3=C1N=C(COCC)N3CC(C)(O)C	EC50	=	1.4	μM	Kaushik et al., RSC Med Chem 2021, 12, 1065-1120
TLR8	R-848	NC1=NC(C=CC=C2)=C2C3=C1N=C(COCC)N3CC(C)(O)C	EC50	=	6.4	μM	Kaushik et al., RSC Med Chem 2021, 12, 1065-1120
TLR7	CL097	CCOCC1=NC2=C(N1)C3=CC=CC=C3N=C2N	agonist				Tanji et al., Science 2013, 339, 1426-1429
TLR8	CL097	CCOCC1=NC2=C(N1)C3=CC=CC=C3N=C2N	agonist				Tanji et al., Science 2013, 339, 1426-1429
TLR8	CU-CPT8m	NC(C1=C2N(N=C1)C(C3=CC=CC(C)=C3)=CC=N2)=O	IC50	=	67	nM	Zhang et al., Nat Chem Biol 2018, 14, 58-64
TLR8	CU-CPT8m	NC(C1=C2N(N=C1)C(C3=CC=CC(C)=C3)=CC=N2)=O	Kd	=	220	nM	Zhang et al., Nat Chem Biol 2018, 14, 58-64
TLR7	Cpd-7	CC1=C2C(N(CC3=CC=C(CN4C[C@H]5N(C)C[C@@H]4C5)C=C3)C(C6=CN=CC(F)=C6)=N2)=NC(OCC)=N1	IC50	=	0.192	μM	Tojo et al., Nat Commun 2020, 11, 5204
TLR7	Cpd-7	CC1=C2C(N(CC3=CC=C(CN4C[C@H]5N(C)C[C@@H]4C5)C=C3)C(C6=CN=CC(F)=C6)=N2)=NC(OCC)=N1	Kd	=	7.4	μM	Tojo et al., Nat Commun 2020, 11, 5204
TLR9	Chloroquine	CCN(CCCC(NC1=CC=NC2=C1C=CC(Cl)=C2)C)CC	IC50	=	80	nM	Kužnik et al., J Immunol 2011, 186, 4794-4804
TLR9	CPG-52364	CN(CC1)CCN1C(C=C2)=CC=C2C3=NC(NCCN4CCOCC4)=C5C(C=C(OC)C(OC)=C5)=N3	IC50	=	7.7	nM	WO 2008/152471 A1
TLR9	CPG-52364	CN(CC1)CCN1C(C=C2)=CC=C2C3=NC(NCCN4CCOCC4)=C5C(C=C(OC)C(OC)=C5)=N3	IC50	=	6	nM	WO 2008/152471 A1
TLR9	Dihydropyrrolo[2,3‑d]pyrimidine-18	OCCN(CC1)CCN1C(C=C2)=CC=C2C3=NC4=C(CCN4CCCN5CCOCC5)C=N3	IC50	=	13	nM	Watanabe et al., ACS Med Chem Lett 2014, 5, 1235-1239
TLR9	E6446	C1(OCCCN2CCCC2)=CC=C3C(OC(C4=CC=C(OCCCN5CCCC5)C=C4)=N3)=C1	IC50	=	10	nM	Franklin et al., Proc Nat Acad Sci 2011, 108, 3689-3694
TLR9	COV08-0064	OC1=C(O2)C3=C(C=C1)C[C@H](N(CC4)CC5CC5)[C@]6(O)[C@@]34[C@H]2[C@H](NC)CC6	IC50	>	100	nM	Hoque et al., J Immunol 2013, 190, 4297-4304
TLR7	2-Phenyl-indole-5-piperidine 7f	CC(C)C1=C(C2=CC=C(OC)C(OC)=C2)NC3=CC=C(C4CCN(CCNC)CC4)C=C31	IC50	=	43	nM	ACS Med Chem Lett 2020, 11, 1751-1758
TLR9	2-Phenyl-indole-5-piperidine 7f	CC(C)C1=C(C2=CC=C(OC)C(OC)=C2)NC3=CC=C(C4CCN(CCNC)CC4)C=C31	IC50	=	510	nM	ACS Med Chem Lett 2020, 11, 1751-1758
TLR7	2-Phenylimidazolpyridine 42	CC(C)N(CC1)CCN1C2=CC3=NC(C4=CC=C(OC)C=C4OC)=CN3C=C2	IC50	=	466	nM	Das et al., J Med Chem 2022, 65, 11607-11632
TLR9	2-Phenylimidazolpyridine 42	CC(C)N(CC1)CCN1C2=CC3=NC(C4=CC=C(OC)C=C4OC)=CN3C=C2	IC50	=	40	nM	Das et al., J Med Chem 2022, 65, 11607-11632
TLR7	Substituted purine 29	CCN(CC1)CCN1C2=C3C(N(CCCN4CCCC4)C=N3)=NC(NCC5=CC=C(OC)C=C5)=N2	IC50	=	2.66	μM	Kundu et al., J Med Chem 2021, 64, 9279-9301
TLR9	Substituted purine 29	CCN(CC1)CCN1C2=C3C(N(CCCN4CCCC4)C=N3)=NC(NCC5=CC=C(OC)C=C5)=N2	IC50	=	0.08	μM	Kundu et al., J Med Chem 2021, 64, 9279-9301
NOD1	iE-DAP	N[C@@H](C(O)=O)CCC(N[C@H](C(O)=O)CCC[C@H](C(O)=O)N)=O	agonist				Kitaura et al., J Med Chem 1982, 25, 335-337
NOD2	MDP	OC[C@H]1O[C@@H](O)[C@H](NC(C)=O)[C@@H](O[C@H](C)C(N[C@@H](C)C(N[C@@H](C(N)=O)CCC(O)=O)=O)=O)[C@@H]1O	EC50	=	186	nM	Griffin et al., ACS Chem Biol 2023, 18, 1368-1377
NOD2	MDP	OC[C@H]1O[C@@H](O)[C@H](NC(C)=O)[C@@H](O[C@H](C)C(N[C@@H](C)C(N[C@@H](C(N)=O)CCC(O)=O)=O)=O)[C@@H]1O	Kd	=	51	nM	Grimes et al., J Am Chem Soc 2012, 134, 13535-13537
NOD1	x-alk-iE-DAP	N[C@@H](C(O)=O)CCC[C@@H](C(O)=O)NC(CC[C@H](C(O)=O)NC(CC1(N=N1)CCC#C)=O)=O	EC50	=	20.4	nM	Wang et al., ACS Chem Biol 2019, 14, 405-414
NOD2	x-alk-MDP	OC[C@H]1O[C@@H](O)[C@H](NC(CC2(N=N2)CCC#C)=O)[C@@H](O[C@H](C)C(N[C@@H](C)C(N[C@@H](C(N)=O)CCC(O)=O)=O)=O)[C@@H]1O	agonist				Wang et al., ACS Chem Biol 2019, 14, 405-414
NOD1	FK-156	N[C@@H](C(O)=O)CCC[C@@H](C(O)=O)NC(CC[C@H](C(O)=O)NC([C@@H](NC([C@H](O)C)=O)C)=O)=O	agonist				Hemmi et al., J Am Chem Soc 1981, 103, 7026-7028
NOD1	FK-565	N[C@@H](C(O)=O)CCC[C@@H](C(O)=O)NC(CC[C@H](C(O)=O)NC(CCCCCC)=O)=O	agonist				Kitaura et al., Experientia, 1982, 38, 1101-1103
NOD2	Romurtide	OC[C@H]1O[C@@H](O)[C@H](NC(C)=O)[C@@H](O[C@H](C)C(N[C@@H](C)C(N[C@@H](C(N)=O)CCC(N[C@@H](CCCCNC(CCCCCCCCCCCCCCCCC)=O)C(O)=O)=O)=O)=O)[C@@H]1O	agonist				Guryanova & Khaitov, Front Immunol 2021, 12, 607178
NOD2	Mifamurtide	OC[C@H]1O[C@@H](O)[C@H](NC(C)=O)[C@@H](O[C@H](C)C(N[C@@H](C)C(N[C@@H](C(N)=O)CCC(N[C@H](C(NCCOP(OCC(COC(CCCCCCCCCCCCCCC)=O)OC(CCCCCCCCCCCCCCC)=O)(O)=O)=O)C)=O)=O)=O)[C@@H]1O	agonist				Guryanova & Khaitov, Front Immunol 2021, 12, 607178
NOD2	LK-415	O=C(N[C@@H](C)C(N[C@@H](C(N)=O)CCC(O)=O)=O)COCCNC(C1(C2)C[C@H]3C[C@H](C[C@@H]2C3)C1)=O	agonist				Vranešić et al., Helv Chim Acta, 1993, 76, 1752-1758
NOD2	LK-409	O=C(N[C@@H](C)C(N[C@@H](C(N)=O)CCC(O)=O)=O)CCCCCC(C)=O	agonist				Sollner et al., Agents Actions, 1993, 38, 273-280
NOD2	LK-423	O=C(N[C@@H](C)C(N[C@@H](C(N)=O)CCC(O)=O)=O)COCCN(C(C1=C2C=CC=C1)=O)C2=O	agonist				Urleb et al., Arch. Pharm. (Weinheim)., 1995, 328, 113-117.
NOD2	Cinnamoyl glycine 9	O=C(CNC(/C=C/C1=CC=C(O)C(OC)=C1)=O)N[C@@H](C(C)C)C(N[C@@H](C(OCC)=O)CCC(OCC)=O)=O	EC50	=	46	nM	Gobec et al., J Med Chem, 2018, 61, 2707-2724
NOD2	TT030	O=C(C1=C(C)N(C2=CC(NC=C2)=O)N=C1C)N[C@@H](C(C)C)C(N[C@@H](C(OCC)=O)CCC(OCC)=O)=O	EC50	=	398	nM	Griffin et al., ACS Chem Biol 2023, 18, 1368-1377
NOD1	Noditinib	NC1=NC2=CC=CC=C2N1S(C3=CC=C(C)C=C3)(=O)=O	IC50	=	0.56	μM	Khan et al., ACS Med Chem Lett 2011, 2, 780-785
NOD2	GSK-717	CN(C(C1=CC=CC=C1)=O)CCC2=NC3=CC=CC=C3N2CC(NC4=CC=C(CCC5)C5=C4)=O	IC50	=	0.4	μM	Rickard et al., PLoS One 2013, 8, e69619
NOD1	GSK-217	O=C1N(C2=CC(NS(C3=CC=CC=C3F)(=O)=O)=C(Cl)C=C2)C(C)=NC4=CC=CC=C41	IC50	=	0.06	μM	Rickard et al., PLoS One 2014, 9, e96737
NLRP1	Val-boroPro	O=C([C@@H](N)C(C)C)N1[C@H](B(O)O)CCC1	agonist				Okondo et al., Cell Chem Biol 2018, 25, 262-267
NLRP3	MCC950	O=C(NC1=C(CCC2)C2=CC3=C1CCC3)NS(=O)(C4=CC(C(C)(C)O)=CO4)=O	IC50	=	7.5	nM	Coll et al., Nat Medicine 2015, 21, 248-257
NLRP3	MCC950	O=C(NC1=C(CCC2)C2=CC3=C1CCC3)NS(=O)(C4=CC(C(C)(C)O)=CO4)=O	Kd	=	10.6	nM	Coll et al., Nat Chem Biol 2019, 15, 556-559
NLRP3	Oridonin	O[C@H]1[C@]2([H])C(C)(C)CC[C@H](O)[C@@]23[C@@]4([H])[C@@]([C@H](O)[C@H](C5=C)CC4)(C5=O)[C@]1(O)OC3	Kd	=	52.5	nM	He et al., Nat Commun 2018, 9, 2550
NLRP3	Tranilast	O=C(O)C1=C(NC(/C=C/C2=CC=C([OMe])C([OMe])=C2)=O)C=CC=C1	antagonist				Huang et al., EMBO Mol Med 2018, 10, e8689
NLRP3	BMS-986299	NC1=C2C(NC(CN(C(C)=O)CC)=N2)=C3C(C=C(C4=NNC=C4)C=C3)=N1	EC50	=	1.28	μM	WO 2018/152396 A1
NLRP6	Lipoteichoic acid		Kd	=	6.22e-11	M	Hara et al., Cell 2018, 175, 1651-1664
cGAS	RU.521	O=C(OC1C(C(C)=NN2C3=NC(C=CC(Cl)=C4Cl)=C4N3)=C2O)C5=C1C=CC=C5	IC50	=	700	nM	Vincent et al., Nat Commun 2017, 8, 750
cGAS	RU.521	O=C(OC1C(C(C)=NN2C3=NC(C=CC(Cl)=C4Cl)=C4N3)=C2O)C5=C1C=CC=C5	Kd	=	36.2	nM	Vincent et al., Nat Commun 2017, 8, 750
cGAS	G150	ClC1=C(Cl)C2=C(C(C3=CC=C(N)N=C3)=C1)C4=C(CCN(C(CO)=O)C4)N2	IC50	=	10.2	nM	Lama et al., Nat Commun 2019, 10, 2261
cGAS	PF-06928215	OC1=CC(C2=CC=CC=C2)=NC3=C(C(N[C@H]4[C@H](C(O)=O)CCCC4)=O)C=NN13	Kd	=	0.2	μM	Hall et al., PLoS One 2017, 12, e0184843
STING	2'3'-cGAMP	O=P(O[C@H]1[C@H](N2C(N=C(N)NC3=O)=C3N=C2)O[C@H](CO4)[C@H]1O)([O-])OC[C@H]5O[C@@H](N6C(N=CN=C7N)=C7N=C6)[C@H](O)[C@@H]5OP4([O-])=O	Kd	=	0.11	μM	Gao et al., Cell 2013, 154, 748-762
STING	2'3'-cGsAsMP	O=P(O[C@H]1[C@H](N2C(N=C(N)NC3=O)=C3N=C2)O[C@H](CO4)[C@H]1O)([S-])OC[C@H]5O[C@@H](N6C(N=CN=C7N)=C7N=C6)[C@H](O)[C@@H]5OP4([S-])=O	Kd	=	5	nM	Li et al., Nat Chem Biol 2014, 10, 1043-1048
STING	FAA	O=C1C2=C(C(CC(O)=O)=CC=C2)OC(C3=CC=CC=C3)=C1	agonist				Kim et al., ACS Chem Biol 2013, 8, 1396-1401
STING	DMXAA	CC1=CC=C2C(OC(C(CC(O)=O)=CC=C3)=C3C2=O)=C1C	Kd	=	130	nM	Kim et al., ACS Chem Biol 2013, 8, 1396-1401
STING	MSA-2	O=C(CCC(O)=O)C1=CC2=CC(OC)=C(OC)C=C2S1	agonist				Pan et al., Science 2020, 369, eaba6098
STING	SR-717	O=C(NC1=CC(F)=C(F)C=C1C(O)=O)C2=NN=C(N3C=NC=C3)C=C2	EC50	=	2.1	μM	Chin et al., Science 2020, 369, 993-999
STING	ABZI	O[C@@H](C1=CC=CC=C1)CN(C(C=CC(C(N)=O)=C2)=C2N/3)C3=N\C(C4=CC(C)=NN4CC)=O	agonist				Ramanjulu et al., Nature 2018, 564, 439-443
STING	diABZI	O=C(C1=CC(C)=NN1CC)/N=C2NC3=C(C=CC(C(N)=O)=C3)N\2CCCCN(/C(N4)=N/C(C5=CC(C)=NN5CC)=O)C6=C4C=C(C=C6)C(N)=O	EC50	=	3.1	μM	Ramanjulu et al., Nature 2018, 564, 439-443
STING	3'3'-c-di-GMP	[O-]P(OC[C@H]1O[C@@H](N2C(N=C(N)NC3=O)=C3N=C2)[C@H](O)[C@@H]1O[P-]4(O)=O)(O[C@H]5[C@@H](O)[C@H](N6C(N=C(N)NC7=O)=C7N=C6)O[C@@H]5CO4)=O	antagonist				Ergun et al., Cell 2019, 178, 290-301
STING	Tetrahydroisoquinoline 18	FC1=CC=C2C(C(N(C3=CC(Cl)=C(C(C)(C)C)C=C3)[C@H](C4=CC(OCCO5)=C5C=C4)[C@H]2CC(O)=O)=O)=C1	IC50	=	68	nM	Siu et al., ACS Med Chem Lett 2019, 10, 92-97
STING	SN-011	OC1=C(NS(C2=CC=C(F)C=C2)(=O)=O)C=C(NC(C3=CC=C(C4=CC=CC=C4)C=C3)=O)C=C1	IC50	=	76	nM	Hong et al., Proc Nat Acad Sci 2021, 118, e2105465118
STING	H-151	O=C(NC1=CC=C(CC)C=C1)NC2=CNC3=C2C=CC=C3	IC50	=	88	nM	Hong et al., Proc Nat Acad Sci 2021, 118, e2105465118
STING	C-176	NC1=CC=C(C(NC2=CC=C(I)C=C2)=O)O1	antagonist				Haag et al., Nature 2018, 559, 269-273
STING	C-178	NC1=CC=C(C(NC2=CC=C(C(C=CC=C3)=C3O4)C4=C2)=O)O1	antagonist				Haag et al., Nature 2018, 559, 269-273
STING
